1 **Title: Multiple sclerosis-associated changes in the composition and immune functions of**  
2 **spore-forming bacteria**

3

4 **Running title: Spore-forming bacteria in multiple sclerosis**

5

6 **Authors:** Egle Cekanaviciute<sup>1,†</sup>, Anne-Katrin Pröbstel<sup>1</sup>, Anna Thomann<sup>1,‡</sup>, Tessel F. Runia<sup>1,§</sup>,  
7 Patrizia Casaccia<sup>4,5</sup>, Ilana Katz Sand<sup>4</sup>, Elizabeth Crabtree<sup>1,¶</sup>, Sneha Singh<sup>1</sup>, John Morrissey<sup>1</sup>,  
8 Patrick Barba<sup>1</sup>, Refujia Gomez<sup>1</sup>, Rob Knight<sup>6</sup>, Sarkis K. Mazmanian<sup>7</sup>, Jennifer Graves<sup>1</sup>, Bruce  
9 A.C. Cree<sup>1</sup>, Scott S. Zamvil<sup>1</sup> and Sergio E. Baranzini<sup>1,2,3#</sup>

10

11 **Affiliations:**

12 <sup>1</sup> UCSF Weill Institute for Neurosciences, Department of Neurology, University of California,  
13 San Francisco, CA. USA.

14 <sup>2</sup> Institute for Human Genetics. University of California, San Francisco, CA. USA.

15 <sup>3</sup> Graduate Program for Biomedical Informatics. University of California, San Francisco, CA.  
16 USA.

17 <sup>4</sup> Icahn School of Medicine at Mount Sinai. New York, NY. USA

18 <sup>5</sup> Advanced Science Research Center at The Graduate Center of City University New York, New  
19 York, NY. USA

20 <sup>6</sup> University of California, San Diego. San Diego, CA. USA

21 <sup>7</sup> California Institute of Technology. Pasadena, CA. USA

22

23 <sup>†</sup>Current address: USRA/Space Biosciences Division, NASA Ames Research Center, Moffett  
24 Field, CA, USA.

25 <sup>‡</sup>Current address: Department of Neuroimmunology, Max Planck Institute of Neurobiology,  
26 Martinsried, Germany.

27 <sup>§</sup>Current address: Erasmus MC, Rotterdam, Netherlands.

28 <sup>¶</sup>Current address: Tulane Center for Comprehensive MS Care. New Orleans, LA

29

30

31 Abstract word count: 236

32 Manuscript word count: 3326

33 Number of Figures: 4

34 Number of tables: 1

35 Number Supplementary Figures: 1

36 Number of supplementary Tables: 3

37

38 **Corresponding author:**

39 Sergio E. Baranzini, PhD

40 [Sergio.baranzini@ucsf.edu](mailto:Sergio.baranzini@ucsf.edu)

41 Ph: 415-502-6865

42 Fax: 415-476-5229

43 **Abstract**

44 Multiple sclerosis (MS) is an autoimmune disease of the central nervous system characterized by  
45 adaptive and innate immune system dysregulation. Recent work has revealed moderate  
46 alteration of gut microbial communities in subjects with MS and in experimental, induced  
47 models. However, a mechanistic understanding linking the observed changes in the microbiota  
48 and the presence of the disease is still missing. Chloroform-resistant, spore-forming bacteria  
49 have been shown to exhibit immunomodulatory properties *in vitro* and *in vivo*, but they have not  
50 yet been characterized in the context of human disease. This study addresses the community  
51 composition and immune function of this bacterial fraction in MS. We identify MS-associated  
52 spore-forming taxa and show that their presence correlates with impaired differentiation of IL-10  
53 secreting, regulatory T lymphocytes *in-vitro*. Colonization of antibiotic-treated mice with spore-  
54 forming bacteria allowed us to identify some bacterial taxa favoring IL-10<sup>+</sup> lymphocyte  
55 differentiation and others inducing differentiation of pro-inflammatory, IFN $\gamma$ <sup>+</sup> T lymphocytes.  
56 However, when fed into antibiotic-treated mice, both MS and control derived spore-forming  
57 bacteria were able to induce immunoregulatory responses.

58 Our analysis also identified *Akkermansia muciniphila* as a key organism that may interact either  
59 directly or indirectly with spore-forming bacteria to exacerbate the inflammatory effects of MS-  
60 associated gut microbiota. Thus, changes in the spore-forming fraction may influence T  
61 lymphocyte-mediated inflammation in MS. This experimental approach of isolating a subset of  
62 microbiota based on its functional characteristics may be useful to investigate other microbial  
63 fractions at greater depth.

64

65

66 **Importance:**

67 Despite the rapid emergence of microbiome related studies in human diseases, few go beyond a  
68 simple description of relative taxa levels in a select group of patients. Our study integrates  
69 computational analysis with *in vitro* and *in vivo* exploration of inflammatory properties of both  
70 complete microbial communities and individual taxa, revealing novel functional associations.  
71 We specifically show that while small differences exist between the microbiomes of MS patients  
72 and healthy subjects, these differences are exacerbated in the chloroform resistant fraction. We  
73 further demonstrate that, when purified from MS patients, this fraction is associated with  
74 impaired immunomodulatory responses in vitro.

75

## 76 **Introduction**

77

78 The human gut microbiota is emerging as a major immune regulator in health and disease,  
79 particularly in relation to autoimmune disorders. Most human microbiota studies to date have  
80 been based on unbiased exploration of complete microbial communities. However, limited  
81 sequencing depth, combined with high community richness and natural sample heterogeneity,  
82 might hinder the discovery of physiologically relevant taxonomical differences. Thus, targeted  
83 studies of specific microbial populations with defined characteristics may serve as a  
84 complementary approach to investigate disease-associated changes in gut microbiome.

85

86 Spore-forming bacteria constitute a subset of Gram-positive bacteria that are resistant to 3%  
87 chloroform treatment (1, 2). Both human and mouse spore-forming bacteria have  
88 immunoregulatory functions (3, 4). Mouse spore-forming bacteria include segmented  
89 filamentous bacteria and *Clostridia* species, which have been shown to induce gut T helper  
90 lymphocyte responses (3, 5). More recently, human spore-forming bacteria from a healthy  
91 subject were also reported to induce Tregs *in vitro* and in gnotobiotic mice (4). However,  
92 whether the composition and functions of spore-forming bacteria are altered in immune mediated  
93 diseases is unknown.

94

95 Multiple sclerosis (MS) is a chronic disease of the central nervous system, characterized by  
96 autoimmune destruction of myelin. MS pathogenesis is in part mediated by effector T  
97 lymphocytes, and counterbalanced by Tregs, that limit the autoimmune damage inflicted by the  
98 former population (6, 7) and potentially promote remyelination (8). Recent studies, including our  
99 own, associated MS with moderate changes in the relative amounts of gut microbiota that  
100 exacerbate T lymphocyte-mediated inflammation *in vitro* and *in vivo* by stimulating pro-  
101 inflammatory IFN $\gamma$ + Th1 and inhibiting IL-10+ regulatory T lymphocytes (9, 10).

102

103 We hypothesized that these MS-associated changes in gut microbial communities may involve  
104 spore-forming bacteria thus altering its overall immunoregulatory properties. To address this  
105 hypothesis, we isolated spore-forming bacteria from untreated patients with relapsing-remitting  
106 MS (RRMS) and matched controls and analyzed their community composition and

107 immunoregulatory functions *in vitro* and in the experimental autoimmune encephalomyelitis  
108 (EAE) mouse model.

109

110

111

## 112 **Results**

113

### 114 **MS-associated differences in microbial community composition are more evident in the** 115 **spore-forming fraction**

116 We isolated the spore-forming bacterial fraction from stool samples of 25 untreated MS patients  
117 and 24 controls and tested their relative abundance by amplicon sequencing of 16S rRNA V4  
118 gene sequencing. This analysis revealed no differences in community richness between patients  
119 and controls (Chao1 metric of alpha diversity, Fig. 1A). However, a focused analysis on the  
120 spore-forming fraction increased sample variability both within and between groups (Fig. 1B)  
121 possibly by reducing the number of taxa of interest and thus amplifying the differences in their  
122 relative abundances (Fig. 1A, 1C).

123

124 Spore-forming bacteria showed notable differences in taxonomical composition between cases  
125 and controls, with 22.43% (135 out of 602 total) OTUs significantly different ( $p=0.05$ , negative  
126 binomial Wald test, Benjamini-Hochberg correction) (Fig. 1D and Suppl. Table 1). These  
127 taxonomical differences were also noticeable at the class level in which *Bacilli* were significantly  
128 overrepresented in controls (Fig. 1E), and *Clostridia*, including *Clostridium perfringens* were  
129 significantly overrepresented in MS patients (Fig. 1F and Suppl. Fig. S1).

130

### 131 **Spore-forming bacteria from MS patients fail to induce anti-inflammatory T lymphocytes** 132 ***in vitro***

133 To investigate whether MS-associated differences in community composition of spore-forming  
134 bacteria were sufficient to alter the immune functions of primary blood mononuclear cells  
135 (PBMCs) from healthy human donors, we exposed human PBMCs to extracts of spore-forming  
136 bacteria isolated either from unrelated controls or from MS patients and used flow cytometry to  
137 evaluate T lymphocyte differentiation under different polarizing conditions (18-20). A  
138 comparison of the PBMC response to extracts of spore-forming bacteria from controls or from  
139 MS patients identified lower conversion into CD4+FoxP3+ Tregs (Fig. 2 A, C), including IL-10  
140 expressing Treg population (Fig. 2 B, D) in the PBMCs exposed to the MS-derived spore-  
141 forming bacteria. These data suggest that spore-forming bacteria from MS patients are  
142 significantly less effective at inducing Treg differentiation. Of note, the small population of

143 Tregs that still differentiated in response to MS bacteria, retained their suppressive capacities *in*  
144 *vitro* (Fig. 2E), thereby indicating that this was a functionally active population. Interestingly, the  
145 percentage of IL-10+ Tregs induced by extracts of spore-forming bacteria positively correlated  
146 with the relative abundance of *Bacilli* and negatively correlated with the relative abundance of  
147 *Clostridia* (Fig. 2 F, expressed as *Clostridia-Bacilli* difference). Thus, the community  
148 composition of spore-forming bacteria (i.e. high *Clostridia*, low *Bacilli*) associated with MS was  
149 also correlated with an inhibition of their respective immunoregulatory functions.

150

### 151 **Gnotobiotic mouse models reveal associations between individual bacterial taxa and T** 152 **lymphocyte responses**

153 To determine whether the MS-associated reduction in the ability of spore-forming bacteria to  
154 stimulate Treg differentiation was physiologically significant, we colonized a group of female  
155 antibiotic-treated mice (21) with spore-forming bacteria from either controls (n=2) or MS  
156 subjects (n=2) and measured the course and severity of EAE. We observed a significant  
157 reduction in disease severity in all mice whose GI tracts were reconstituted with spore-forming  
158 bacteria. However, this reduction was independent of whether the spore-forming fraction was  
159 isolated from MS or controls (Fig. 3 A). This indicated that while MS-derived spore-forming  
160 bacteria could be functionally distinguished *in vitro*, these differences were not sufficient to  
161 induce a phenotype *in vivo* in our experimental setting.

162

163 We next analyzed whether spore-forming bacteria regulated T lymphocyte responses *in vivo*. To  
164 this end we colonized antibiotic-treated mice with spore-forming bacteria from 3 controls and 3  
165 MS patients and analyzed the resulting changes in bacterial composition and T lymphocyte  
166 differentiation. Principal coordinate analysis (PCoA) of the beta diversity of gut microbiota  
167 separated SPF mice from antibiotic-treated and colonized (i.e. gnotobiotic) mice. While no major  
168 shifts in community composition based on disease state of the donor were observed (Fig. 3B),  
169 multiple microbial taxa were differentially abundant (Fig. 3C, Suppl. Tables 2, 3), including an  
170 increase in *Akkermansia* (3 OTUs corresponding to *A. muciniphila*; Suppl. Table 3) in mice  
171 colonized with spore-forming bacteria from MS patients.

172

173 Further investigation identified individual taxa that were classified as either pro-inflammatory or  
174 anti-inflammatory- based on the correlation between their relative abundance in mouse stool  
175 samples and their ability to alter differentiation of IFN $\gamma$ + Th1 or IL-10+ regulatory lymphocytes  
176 from either spleen or mesenteric lymph nodes (MLN) *in vitro* (Fig. 3D, 3E). The pro-  
177 inflammatory category (Fig. 3D, red rectangle) included taxa significantly increased in mice  
178 colonized with spore-forming bacteria from MS patients compared to controls (highlighted in  
179 red), while the anti-inflammatory category (mostly evident in splenocytes; blue rectangle)  
180 contained taxa significantly reduced in mice colonized with spore-forming bacteria from MS  
181 patients (highlighted in blue).

182

183 The increase in *Akkermansia muciniphila*, a non-spore-forming bacteria, in gnotobiotic mice  
184 colonized with spore-forming bacteria from MS patients led to the hypothesis that spore-forming  
185 bacteria may regulate *Akkermansia* levels. The correlation between spore-forming community  
186 composition and relative abundance of *Akkermansia* is shown in Fig. 4A. The increase in  
187 *Akkermansia* was present not only in the mice colonized with spore-forming bacteria from MS  
188 donors, but also in MS donors themselves ( $p = 1.5E^{-09}$ , negative binomial Wald test) (Fig. 4B).  
189 Of interest, we and others (9, 10) recently reported the increased abundance of *Akkermansia* in  
190 untreated MS patients and identified this bacterium as sufficient for driving T lymphocyte  
191 differentiation into the pro-inflammatory IFN $\gamma$ + Th1 phenotype *in-vitro* (10). Consistent with  
192 this result, we also observed a significant positive correlation between the relative abundance of  
193 *Akkermansia* and IFN $\gamma$ + Th1 lymphocyte differentiation (Fig. 4C) in gnotobiotic mice. While  
194 other taxa also correlated with *Akkermansia* levels and T lymphocyte differentiation (Fig. 4D)  
195 our data suggest that the observed immunological effects may be at least partially mediated by  
196 *Akkermansia*.

197

198

199



## 200 **Discussion**

201 The spore-forming fraction of gut bacteria has been associated with immunoregulatory properties  
202 (4). Here we examined the structural composition and immunological effects of the spore-  
203 forming fraction of gut microbiota from subjects with MS compared to controls. MS-associated  
204 differences in bacterial community composition were correlated with impaired anti-inflammatory  
205 functions, as evidenced by a reduction in their ability to drive T lymphocyte differentiation into  
206 IL-10+ Tregs *in vitro*. Meanwhile, colonizing antibiotic-treated mice with spore-forming  
207 bacteria allowed us to identify specific taxa correlated with T lymphocyte differentiation into  
208 IFN $\gamma$ + and IL-10+ subtypes *in vivo*.

209

210 Our results contribute to the evidence supporting the immunoregulatory functions of spore-  
211 forming bacteria and show that these functions may be compromised in the context of  
212 autoimmunity. Previous studies on spore-forming bacteria had been conducted by isolating this  
213 fraction from a single healthy donor (4, 22). This approach allowed focusing on donor-specific  
214 bacterial strains, but provided limited information about the “baseline” composition and  
215 variability of this bacterial community in healthy humans. Here we used multiple healthy control  
216 donors to establish the baseline community composition of spore-forming bacteria, and  
217 compared these healthy profiles with those from patients with MS.

218

219 Our data corroborate previous findings that spore-forming bacteria, almost exclusively belonging  
220 to the phylum *Firmicutes*, and classes *Clostridia* and *Bacilli*, induce anti-inflammatory T  
221 lymphocytes *in vitro* and protect from autoimmune inflammation *in vivo* (4, 5). We also show  
222 that the taxonomical distribution and immunoregulatory functions of spore-forming bacteria are  
223 altered in MS patients. While we were able to show that these differences have functional  
224 consequences *in-vitro*, they were not sufficient to alter the course of EAE using antibiotic treated  
225 mice. One possible explanation for this counterintuitive finding is that since our mice were  
226 treated with antibiotics, they were not completely germ-free prior to colonization. As a  
227 consequence, unexpected interactions among antibiotic resistant communities and the spore-  
228 forming fraction may have influenced the course of EAE. We recognize that using GF mice for  
229 these experiments could address some of these concerns. However, raising GF animals is still a  
230 highly specialized enterprise only available at select institutions. Further studies of gene

231 expression and metabolic output of spore-forming bacteria may provide therapeutic targets for  
232 regulating T lymphocyte responses to reduce autoimmune inflammation.

233

234 The mechanisms by which spore-forming bacteria regulate host T lymphocyte differentiation  
235 remain to be discovered. Interestingly, an overlapping subset of bacterial taxa has recently been  
236 shown to inhibit host proteases, including cathepsins (23), which mediate adaptive immune  
237 responses by increasing Th17 (24) and limiting Treg differentiation (25). Although future studies  
238 are needed to establish this firmly, it is possible that spore-forming bacteria from controls, but  
239 not MS patients are able to stimulate Treg responses via cathepsin inhibition.

240

241 Furthermore, healthy human spore-forming bacteria produce short chain fatty acids (SCFAs),  
242 including butyrate and acetate (26), which have been observed to stimulate Treg and inhibit Th1  
243 differentiation *in vitro* and *in vivo* (27), Mizuno 2017). Either pure butyrate or butyrate-  
244 producing spore-forming bacteria from healthy humans have been shown to be sufficient Treg  
245 induction (28) in mice. Thus, human T lymphocyte differentiation into Tregs may be driven by a  
246 yet-undiscovered SCFA-synthesizing subset of spore-forming bacteria that is present in controls  
247 and absent in MS patients.

248

249 *Akkermansia muciniphila* has previously been reported to be increased in MS patients compared  
250 to controls (9, 10, 29) and to have pro-inflammatory functions *in vitro* (10). In addition,  
251 *Akkermansia* has been shown to be resistant to broad-spectrum antibiotics (30), which in part  
252 may explain its persistence in mice colonized with spore-forming bacteria. The fact that high  
253 levels of *Akkermansia* were only seen in mice colonized with MS chloroform-resistant bacteria  
254 suggests that its population is normally regulated by commensals that are depleted in MS thus  
255 enabling *Akkermansia* overgrowth.

256

257 Our finding that *Clostridium perfringens* is more abundant in the spore-forming bacterial fraction  
258 of MS patients is consistent with the association of *C. perfringens* with neuromyelitis optica  
259 (NMO), another demyelinating autoimmune disease (31-33). Putative mechanisms of *C.*  
260 *perfringens*-mediated autoimmunity include molecular mimicry between *C. perfringens* peptide

261 and a self-antigen in the human host (Varrin-Doyer 2012), and toxin-mediated increase in  
262 neuronal damage (32, 34).

263

264 Due to the high variability of spore-forming bacteria across donors, mouse colonization with  
265 samples from additional donor pairs would be required to assess whether MS-associated  
266 reduction in regulatory T lymphocyte differentiation *in vitro* can be reliably reproduced *in vivo*.  
267 However, a major advantage of gnotobiotic mouse models is the ability to assess the association  
268 between immune responses and microbial abundance within experimental communities. The  
269 identification of additional taxa capable of inducing clear differentiation paths in immune cells  
270 will further contribute to our understanding their role in immune regulation. For example, our  
271 findings corroborate the anti-inflammatory functions of relatively unknown bacterial genera such  
272 as *Anaeroplasm*a and *Dehalobacterium* in mouse models of inflammation (35, 36).

273

274 In conclusion, we have investigated the immune functions of the spore-forming fraction of  
275 human gut microbiota in health and disease, using MS as a model of autoimmune inflammation.  
276 We identified novel bacterial taxa associated with MS as well as with T lymphocyte  
277 differentiation into both pro-inflammatory and regulatory phenotypes. Further studies of spore-  
278 forming bacteria and other experimentally defined bacterial populations may reveal specific  
279 immunoregulatory mechanisms in MS and other diseases that may be targeted by therapeutic  
280 interventions.

281

282

283 **Acknowledgements:** We thank all subjects who participated in this study. Funding was provided by  
284 a grant (CA\_1072-A-7) from the National MS Society. This study was also supported by a generous gift from  
285 the Valhalla Charitable Foundation. S.E.B is the Heidrich Family and Friends Endowed Chair in Neurology.

286

## 287 **Materials and Methods**

288

### 289 **Isolation of spore-forming bacteria from human fecal samples**

290 Fecal samples were collected from 25 adult patients with RRMS that had not received disease-  
291 modifying or steroid treatment for at least 3 months prior to the time of collection and 24  
292 subjects without MS or any other autoimmune disorder (controls) at the University of California,  
293 San Francisco (UCSF) (Table 1). The inclusion criteria specified no use of antibiotics or  
294 oncologic therapeutics in 3 months prior to the study. All individuals signed a written informed  
295 consent in accordance with the sampling procedure approved by the local Institutional Review  
296 Board. Samples were stored in collection vials (Fisher #NC9779954) at -80° C until bacterial  
297 isolation.

298

299 Spore-forming bacteria were isolated based on their resistance to chloroform as described  
300 previously (Atarashi 2013). Briefly, total bacteria were isolated from stool samples by  
301 suspending ~0.5mg stool sample in 1.5ml PBS, passing it three times through a 70µm cell  
302 strainer and washing twice with 1.5ml PBS by spinning at 8000rpm. The resulting suspension  
303 was diluted in 5ml PBS, mixed with chloroform to the final concentration of 3%, and incubated  
304 on a shaker for 1h at room temperature. After incubation, chloroform was removed from the  
305 solution by bubbling nitrogen (N<sub>2</sub>) gas for 30min. Chloroform-treated bacteria were then  
306 cultured on OxyPRAS Brucella Blood Agar plates (Oxyrase #P-BRU-BA) for 96 hours followed  
307 by Brucella Broth (Anaerobe Systems #AS-105) for 48 hours, and isolated for sequencing, *in*  
308 *vitro* experiments and *in vivo* experiments.

309

### 310 **16S rRNA amplicon sequencing and computational analysis**

311 DNA was extracted from mouse fecal or human chloroform-resistant bacterial culture samples  
312 using MoBio Power Fecal DNA extraction kit (MoBio #12830) according to manufacturer's  
313 instructions. For each sample, PCR targeting the V4 region of the prokaryotic 16S rRNA gene  
314 was completed in triplicate using the 515/806 primer pair, and amplicons were sequenced on  
315 NextSeq at the Microbiome Profiling Services core facility at UCSF using the sequencing  
316 primers and procedures described in the Earth Microbiome Project standard protocol (11).

317

318 Analysis was performed using QIIME v1.9 as described (12). Essentially, amplicon sequences  
319 were quality-filtered and grouped to “species-level” OTUs via SortMeRNA method (13), using  
320 Greengenes v.13.8 97% dataset for closed reference. Sequences that did not match reference  
321 sequences in the Greengenes database were dropped from analysis. Taxonomy was assigned to  
322 the retained OTUs based on the Greengenes reference sequence, and the Greengenes tree was  
323 used for all downstream phylogenetic community comparisons. OTUs were filtered to retain  
324 only OTUs present in at least 5% of samples and covering at least 100 total reads. After filtering,  
325 samples were rarefied to 10000 sequences per sample. Alpha diversity was calculated using the  
326 Chao1 method (14). For analysis of beta diversity, pairwise distance matrices were generated  
327 using the phylogenetic metric unweighted UniFrac (15) and used for principal coordinate  
328 analysis (PCoA). For comparison of individual taxa, samples were not rarefied. Instead, OTU  
329 abundances were normalized using variance-stabilizing transformation and taxa distributions  
330 were compared using Wald negative binomial test from R software package DESeq2 as  
331 described previously (16, 17) with Benjamini-Hochberg correction for multiple comparisons.  
332 Linear correlations between bacterial taxa and lymphocyte proportions were computed after  
333 variance-stabilizing transformation of bacterial abundances (16).

334

### 335 **Mouse colonization with microbiota**

336 Female littermates 5 week old C57BL/6J mice (JAX #000664) were treated with 1% solution of  
337 Amphotericin B in drinking water for 3 days, followed by 2 weeks of a solution composed of 1%  
338 Amphotericin B, 1mg/ml ampicillin, 1mg/ml neomycin, 1mg/ml metronidazole and 0.5mg/ml  
339 vancomycin in drinking water. After 2 weeks, the drinking solution was replaced by sterile water  
340 and mice were gavaged with specific bacteria of interest at  $2 \times 10^8$  CFU in 100ul per mouse  
341 every 2 days for 2 weeks (7 total gavages). Bacterial colonization was either followed by the  
342 induction of EAE or immunophenotyping of mesenteric and cervical lymph nodes.

343

344 To induce EAE, mice were immunized in both flanks with 0.1ml MOG<sub>35-55</sub> emulsion (1.5  
345 mg/ml) mixed with Complete Freund’s Adjuvant and killed *Mycobacterium tuberculosis* H37Ra  
346 (2mg/ml), followed by two 0.1ml intraperitoneal injections of pertussis toxin (2μg/ml)  
347 immediately and at 48h after MOG/CFA injections. Mice were scored daily in a blinded fashion  
348 for motor deficits as follows: 0, no deficit; 1, limp tail only; 2, limp tail and hind limb weakness;

349 3, complete hind limb paralysis; 4, complete hind limb paralysis and at least partial forelimb  
350 paralysis; 5, moribund.

351  
352 At the time of euthanasia, mouse mesenteric lymph nodes, and spleens were dissected and  
353 processed by grinding tissues through a 70µm cell strainer. Entire mesenteric and cervical lymph  
354 nodes and 10<sup>7</sup> splenocytes per mouse were stimulated for 4-5 hours with 20ng/ml PMA and  
355 1µg/ml ionomycin in presence of protein transport inhibitor (GolgiPlug, BD #51-2301KZ) and  
356 used immediately for immunophenotyping, while the remaining splenocytes were stored for *in*  
357 *vitro* bacterial stimulations.

358

### 359 **Bacterial stimulation of human immune cells**

360 Human peripheral blood mononuclear cells were isolated from healthy volunteers and stored at -  
361 80° C in cryovials at 10<sup>7</sup> cells/ml concentration in FBS containing 10% DMSO. Before plating,  
362 cells were washed in PBS twice, re-counted, and plated at 10<sup>6</sup> cells/ml concentration in RPMI  
363 media supplemented with 10% FBS and 1% penicillin/streptomycin/glutamine. Cells were  
364 stimulated for 3 days as described previously (18) with anti-human CD3 (BD #555336, 0.3  
365 µg/ml), anti-human CD28 (BD #555725, 2 µg/ml) and recombinant human TGF-β1 (R&D  
366 #240B002, 2.5ng/ml).

367  
368 Bacteria isolated from human chloroform-resistant cultures were resuspended in PBS  
369 supplemented with protease inhibitor (Roche #4693159001) and phosphatase inhibitor (Roche  
370 #4906845001), heat-inactivated at 65° C for 1h and sonicated for 10min as described previously  
371 (19). Protein concentration in the resulting suspension was measured using the Pierce BCA  
372 protein assay kit (Thermo Scientific #23227). Bacterial extracts were added to PBMCs at 1µg/ml  
373 1h after plating as described previously (20). PBS with the same protease inhibitor and  
374 phosphatase inhibitor was added as the no-bacteria control. Each human *in vitro* experiment  
375 contained at least 6 independent donor bacterial samples and was repeated at least twice.

376

### 377 **Immunostaining, flow cytometry and FACS of human immune cells**

378 Human PBMCs were immunostained using standard protocols. Live/dead cell gating was  
379 achieved using Live/Dead Fixable Aqua kit (ThermoFisher #L34957). FoxP3/transcription factor

380 staining buffer set (eBioscience #00-5523-00) was used for staining of intracellular and  
381 intranuclear cytokines. The following antibodies were used for human PBMC staining: anti-  
382 CD3-PE.Cy7 (BD #563423), anti-CD4-PerCP.Cy5.5 (BioLegend #300530), anti-CD25-APC  
383 (BD #555434), anti-FoxP3-AlexaFluor488 (BD #560047) and anti-IL-10-PE (eBioscience #12-  
384 7108).

385

386 Flow cytometry was performed on BD Fortessa cell analyzer and analyzed using FlowJo  
387 software (TreeStar). Cells were gated to identify the lymphocyte population based on forward  
388 and side scatter, followed by gating for single color and live cell populations. Fluorescence  
389 minus one (FMO) was used for gating. Unstained, single color and fluorescence-minus-one  
390 controls were used to identify stained populations. For T lymphocyte suppression assay, control  
391 CD4<sup>+</sup> CD25<sup>+</sup> lymphocytes were sorted from PBMC cultures incubated with extracts from  
392 unrelated control or MS spore-forming bacteria in Treg-differentiating conditions on Aria III cell  
393 sorter (BD Biosciences) and cultured with CD4<sup>+</sup> CD25<sup>-</sup> from the same donor pre-loaded with a  
394 CFSE cell division tracker kit. Statistical significance of expression changes in markers of T  
395 lymphocyte differentiation and proliferation was determined using two-tailed Student's *t* test to  
396 compare samples from different donors and two-tailed repeated measures *t* test to compare  
397 samples from the same donor. GraphPad Prism 6 software was used to analyze and plot the data.  
398  $P < 0.05$  was considered statistically significant.

399

#### 400 **Data availability:**

401 All 16S amplicon sequencing data presented in this article are available from the corresponding  
402 author upon request.

403

404 **References:**

405

406

407

- 408 1. Itoh, K., and T. Mitsuoka. 1985. Comparison of media for isolation of mouse  
409 anaerobic faecal bacteria. *Lab Anim* 19: 353-358.
- 410 2. Itoh, K., and T. Mitsuoka. 1985. Characterization of clostridia isolated from faeces of  
411 limited flora mice and their effect on caecal size when associated with germ-free  
412 mice. *Lab Anim* 19: 111-118.
- 413 3. Gaboriau-Routhiau, V., S. Rakotobe, E. Lecuyer, I. Mulder, A. Lan, C. Bridonneau, V.  
414 Rochet, A. Pisi, M. De Paepe, G. Brandi, G. Eberl, J. Snel, D. Kelly, and N. Cerf-  
415 Bensussan. 2009. The key role of segmented filamentous bacteria in the coordinated  
416 maturation of gut helper T cell responses. *Immunity* 31: 677-689.
- 417 4. Atarashi, K., T. Tanoue, K. Oshima, W. Suda, Y. Nagano, H. Nishikawa, S. Fukuda, T.  
418 Saito, S. Narushima, K. Hase, S. Kim, J. V. Fritz, P. Wilmes, S. Ueha, K. Matsushima, H.  
419 Ohno, B. Olle, S. Sakaguchi, T. Taniguchi, H. Morita, M. Hattori, and K. Honda. 2013.  
420 Treg induction by a rationally selected mixture of Clostridia strains from the human  
421 microbiota. *Nature* 500: 232-236.
- 422 5. Atarashi, K., T. Tanoue, T. Shima, A. Imaoka, T. Kuwahara, Y. Momose, G. Cheng, S.  
423 Yamasaki, T. Saito, Y. Ohba, T. Taniguchi, K. Takeda, S. Hori, Ivanov, II, Y. Umesaki, K.  
424 Itoh, and K. Honda. 2011. Induction of colonic regulatory T cells by indigenous  
425 Clostridium species. *Science* 331: 337-341.
- 426 6. Ochoa-Reparaz, J., and L. H. Kasper. 2017. The influence of gut-derived CD39  
427 regulatory T cells in CNS demyelinating disease. *Transl Res* 179: 126-138.
- 428 7. Kleiweiefeld, M., and D. A. Hafler. 2014. Regulatory T cells in autoimmune  
429 neuroinflammation. *Immunol Rev* 259: 231-244.
- 430 8. Dombrowski, Y., T. O'Hagan, M. Dittmer, R. Penalva, S. R. Mayoral, P. Bankhead, S.  
431 Fleville, G. Eleftheriadis, C. Zhao, M. Naughton, R. Hassan, J. Moffat, J. Falconer, A.  
432 Boyd, P. Hamilton, I. V. Allen, A. Kissenpfennig, P. N. Moynagh, E. Evergren, B. Perbal,  
433 A. C. Williams, R. J. Ingram, J. R. Chan, R. J. M. Franklin, and D. C. Fitzgerald. 2017.



- 434 Regulatory T cells promote myelin regeneration in the central nervous system. *Nat*  
435 *Neurosci* 20: 674-680.
- 436 9. Berer, K., L. A. Gerdes, E. Cekanaviciute, X. Jia, L. Xiao, Z. Xia, C. Liu, L. Klotz, U.  
437 Stauffer, S. E. Baranzini, T. Kumpfel, R. Hohlfeld, G. Krishnamoorthy, and H. Wekerle.  
438 2017. Gut microbiota from multiple sclerosis patients enables spontaneous  
439 autoimmune encephalomyelitis in mice. *Proc Natl Acad Sci U S A*.
- 440 10. Cekanaviciute, E., B. B. Yoo, T. F. Runia, J. W. Debelius, S. Singh, C. A. Nelson, R.  
441 Kanner, Y. Bencosme, Y. K. Lee, S. L. Hauser, E. Crabtree-Hartman, I. Katz Sand, M.  
442 Gacias, Y. Zhu, P. Casaccia, B. A. C. Cree, R. Knight, S. K. Mazmanian, and S. E.  
443 Baranzini. 2017. Gut bacteria from multiple sclerosis patients modulate human T  
444 cells and exacerbate symptoms in mouse models. *Proc Natl Acad Sci U S A*.
- 445 11. Caporaso, J. G., C. L. Lauber, W. A. Walters, D. Berg-Lyons, J. Huntley, N. Fierer, S. M.  
446 Owens, J. Betley, L. Fraser, M. Bauer, N. Gormley, J. A. Gilbert, G. Smith, and R. Knight.  
447 2012. Ultra-high-throughput microbial community analysis on the Illumina HiSeq  
448 and MiSeq platforms. *Isme J* 6: 1621-1624.
- 449 12. Navas-Molina, J. A., J. M. Peralta-Sanchez, A. Gonzalez, P. J. McMurdie, Y. Vazquez-  
450 Baeza, Z. Xu, L. K. Ursell, C. Lauber, H. Zhou, S. J. Song, J. Huntley, G. L. Ackermann, D.  
451 Berg-Lyons, S. Holmes, J. G. Caporaso, and R. Knight. 2013. Advancing our  
452 understanding of the human microbiome using QIIME. *Methods Enzymol* 531: 371-  
453 444.
- 454 13. Kopylova, E., J. A. Navas-Molina, C. Mercier, Z. Z. Xu, F. Mahé, Y. He, H.-W. Zhou, T.  
455 Rognes, J. G. Caporaso, and R. Knight. 2016. Open-Source Sequence Clustering  
456 Methods Improve the State Of the Art. *mSystems* 1.
- 457 14. Colwell, R. K., A. Chao, N. J. Gotelli, S.-Y. Lin, C. X. Mao, R. L. Chazdon, and J. T.  
458 Longino. 2012. Models and estimators linking individual-based and sample-based  
459 rarefaction, extrapolation and comparison of assemblages. *Journal of Plant Ecology*  
460 5: 3-21.
- 461 15. Lozupone, C., and R. Knight. 2005. UniFrac: a new phylogenetic method for  
462 comparing microbial communities. *Appl Environ Microbiol* 71: 8228-8235.
- 463 16. McMurdie, P. J., and S. Holmes. 2013. phyloseq: an R package for reproducible  
464 interactive analysis and graphics of microbiome census data. *PLoS One* 8: e61217.

- 465 17. McMurdie, P. J., and S. Holmes. 2015. Shiny-phyloseq: Web application for  
466 interactive microbiome analysis with provenance tracking. *Bioinformatics* 31: 282-  
467 283.
- 468 18. Joller, N., E. Lozano, P. R. Burkett, B. Patel, S. Xiao, C. Zhu, J. Xia, T. G. Tan, E. Sefik, V.  
469 Yajnik, A. H. Sharpe, F. J. Quintana, D. Mathis, C. Benoist, D. A. Hafler, and V. K.  
470 Kuchroo. 2014. Treg cells expressing the coinhibitory molecule TIGIT selectively  
471 inhibit proinflammatory Th1 and Th17 cell responses. *Immunity* 40: 569-581.
- 472 19. Sarrabayrouse, G., C. Bossard, J. M. Chauvin, A. Jarry, G. Meurette, E. Quevrain, C.  
473 Bridonneau, L. Preisser, K. Asehnoune, N. Labarriere, F. Altare, H. Sokol, and F.  
474 Jotereau. 2014. CD4CD8alphaalpha lymphocytes, a novel human regulatory T cell  
475 subset induced by colonic bacteria and deficient in patients with inflammatory  
476 bowel disease. *PLoS Biol* 12: e1001833.
- 477 20. Lozupone, C. A., M. Li, T. B. Campbell, S. C. Flores, D. Linderman, M. J. Gebert, R.  
478 Knight, A. P. Fontenot, and B. E. Palmer. 2013. Alterations in the gut microbiota  
479 associated with HIV-1 infection. *Cell Host Microbe* 14: 329-339.
- 480 21. Scher, J. U., A. Sczesnak, R. S. Longman, N. Segata, C. Ubeda, C. Bielski, T. Rostron, V.  
481 Cerundolo, E. G. Pamer, S. B. Abramson, C. Huttenhower, and D. R. Littman. 2013.  
482 Expansion of intestinal *Prevotella copri* correlates with enhanced susceptibility to  
483 arthritis. *Elife* 2: e01202.
- 484 22. Yano, J. M., K. Yu, G. P. Donaldson, G. G. Shastri, P. Ann, L. Ma, C. R. Nagler, R. F.  
485 Ismagilov, S. K. Mazmanian, and E. Y. Hsiao. 2015. Indigenous bacteria from the gut  
486 microbiota regulate host serotonin biosynthesis. *Cell* 161: 264-276.
- 487 23. Guo, C. J., F. Y. Chang, T. P. Wyche, K. M. Backus, T. M. Acker, M. Funabashi, M.  
488 Taketani, M. S. Donia, S. Nayfach, K. S. Pollard, C. S. Craik, B. F. Cravatt, J. Clardy, C. A.  
489 Voigt, and M. A. Fischbach. 2017. Discovery of Reactive Microbiota-Derived  
490 Metabolites that Inhibit Host Proteases. *Cell* 168: 517-526 e518.
- 491 24. Hou, L., J. Cooley, R. Swanson, P. C. Ong, R. N. Pike, M. Bogyo, S. T. Olson, and E.  
492 Remold-O'Donnell. 2015. The protease cathepsin L regulates Th17 cell  
493 differentiation. *J Autoimmun* 65: 56-63.
- 494 25. Sugita, S., S. Horie, O. Nakamura, Y. Futagami, H. Takase, H. Keino, H. Aburatani, N.  
495 Katunuma, K. Ishidoh, Y. Yamamoto, and M. Mochizuki. 2008. Retinal pigment

- 496 epithelium-derived CTLA-2alpha induces TGFbeta-producing T regulatory cells. *J*  
497 *Immunol* 181: 7525-7536.
- 498 26. Narushima, S., Y. Sugiura, K. Oshima, K. Atarashi, M. Hattori, M. Suematsu, and K.  
499 Honda. 2014. Characterization of the 17 strains of regulatory T cell-inducing human-  
500 derived Clostridia. *Gut Microbes* 5: 333-339.
- 501 27. Arpaia, N., C. Campbell, X. Fan, S. Dikiy, J. van der Veecken, P. deRoos, H. Liu, J. R.  
502 Cross, K. Pfeffer, P. J. Coffey, and A. Y. Rudensky. 2013. Metabolites produced by  
503 commensal bacteria promote peripheral regulatory T-cell generation. *Nature* 504:  
504 451-455.
- 505 28. Furusawa, Y., Y. Obata, S. Fukuda, T. A. Endo, G. Nakato, D. Takahashi, Y. Nakanishi, C.  
506 Uetake, K. Kato, T. Kato, M. Takahashi, N. N. Fukuda, S. Murakami, E. Miyauchi, S.  
507 Hino, K. Atarashi, S. Onawa, Y. Fujimura, T. Lockett, J. M. Clarke, D. L. Topping, M.  
508 Tomita, S. Hori, O. Ohara, T. Morita, H. Koseki, J. Kikuchi, K. Honda, K. Hase, and H.  
509 Ohno. 2013. Commensal microbe-derived butyrate induces the differentiation of  
510 colonic regulatory T cells. *Nature* 504: 446-450.
- 511 29. Jangi, S., R. Gandhi, L. M. Cox, N. Li, F. von Glehn, R. Yan, B. Patel, M. A. Mazzola, S. Liu,  
512 B. L. Glanz, S. Cook, S. Tankou, F. Stuart, K. Melo, P. Nejad, K. Smith, B. D. Topcuolu, J.  
513 Holden, P. Kivisakk, T. Chitnis, P. L. De Jager, F. J. Quintana, G. K. Gerber, L. Bry, and  
514 H. L. Weiner. 2016. Alterations of the human gut microbiome in multiple sclerosis.  
515 *Nat Commun* 7: 12015.
- 516 30. Caputo, A., G. Dubourg, O. Croce, S. Gupta, C. Robert, L. Papazian, J. M. Rolain, and D.  
517 Raoult. 2015. Whole-genome assembly of *Akkermansia muciniphila* sequenced  
518 directly from human stool. *Biol Direct* 10: 5.
- 519 31. Varrin-Doyer, M., C. M. Spencer, U. Schulze-Topphoff, P. A. Nelson, R. M. Stroud, B. A.  
520 Cree, and S. S. Zamvil. 2012. Aquaporin 4-specific T cells in neuromyelitis optica  
521 exhibit a Th17 bias and recognize Clostridium ABC transporter. *Ann Neurol* 72: 53-  
522 64.
- 523 32. Rumah, K. R., J. Linden, V. A. Fischetti, and T. Vartanian. 2013. Isolation of  
524 Clostridium perfringens type B in an individual at first clinical presentation of  
525 multiple sclerosis provides clues for environmental triggers of the disease. *PLoS One*  
526 8: e76359.

- 527 33. Cree, B. A., C. M. Spencer, M. Varrin-Doyer, S. E. Baranzini, and S. S. Zamvil. 2016. Gut  
528 microbiome analysis in neuromyelitis optica reveals overabundance of *Clostridium*  
529 *perfringens*. *Ann Neurol* 80: 443-447.
- 530 34. Rumah, K. R., Y. Ma, J. R. Linden, M. L. Oo, J. Anrather, N. Schaeren-Wiemers, M. A.  
531 Alonso, V. A. Fischetti, M. S. McClain, and T. Vartanian. 2015. The Myelin and  
532 Lymphocyte Protein MAL Is Required for Binding and Activity of *Clostridium*  
533 *perfringens* epsilon-Toxin. *PLoS Pathog* 11: e1004896.
- 534 35. Miller, P. G., M. B. Bonn, C. L. Franklin, A. C. Ericsson, and S. C. McKarns. 2015. TNFR2  
535 Deficiency Acts in Concert with Gut Microbiota To Precipitate Spontaneous Sex-  
536 Biased Central Nervous System Demyelinating Autoimmune Disease. *J Immunol* 195:  
537 4668-4684.
- 538 36. Coretti, L., C. Cristiano, E. Florio, G. Scala, A. Lama, S. Keller, M. Cuomo, R. Russo, R.  
539 Pero, O. Paciello, G. Mattace Raso, R. Meli, S. Coccozza, A. Calignano, L. Chiariotti, and  
540 F. Lembo. 2017. Sex-related alterations of gut microbiota composition in the BTBR  
541 mouse model of autism spectrum disorder. *Sci Rep* 7: 45356.
- 542
- 543

544 **Figure Legends**

545

546 **Figure 1. Differences in community composition of spore-forming bacterial fraction in MS**

547 **patients and healthy controls. A-C.** Comparison of microbial community composition of

548 spore-forming bacterial subset and total stool bacteria in untreated MS patients (n=25) and

549 controls (n=24). **A.** Chao1 metric of alpha diversity. **B.** Median and range of distances

550 (unweighted Unifrac distance matrix) within and between sample groups. **C.** Mean relative

551 abundance of microbial genera. **D-F.** Comparison of relative abundances of individual microbial

552 taxa in untreated MS patients (n=25) and controls (n=24). **D.** Volcano plot of relative abundance

553 distribution of microbial OTUs. X axis, log<sub>2</sub> fold of relative abundance ratio between MS

554 patients and controls after variance-stabilizing transformation. Y axis, negative log<sub>10</sub> of P value,

555 negative binomial Wald test, Benjamini-Hochberg correction for multiple comparisons. **E, F.**

556 Relative abundances of bacterial classes *Bacilli* (**E**) and *Clostridia* (**F**) within phylum *Firmicutes*

557 out of spore-forming bacteria from controls and MS patients. Error bars, mean +/- SEM. CTRL,

558 total stool bacteria from controls. CTRL\_spore, spore-forming bacteria from controls. MS, total

559 stool bacteria from MS patients. MS\_spore, spore-forming bacteria from MS patients.

560

561 **Figure 2. Spore-forming bacteria from MS patients inhibit IL-10+ Treg differentiation *in***

562 ***vitro*. A, B.** Representative flow cytometry plots (**A**) and quantification (**B**) of CD4+FoxP3+

563 Tregs within CD3+ lymphocytes differentiated in response to spore-forming bacteria isolated

564 from controls or untreated MS patients. N = 7 PBMC donors; each dot represents an average

565 response from PBMC donor to isolates from 6 control or MS bacteria donors. \*\*P<0.01, two-

566 tailed repeated measures t test. **C, D.** Representative flow cytometry plots (**C**) and quantification

567 (**D**) of IL-10+ lymphocyte population within CD3+CD4+FoxP3+ Tregs differentiated in

568 response to spore-forming bacteria isolated from controls or untreated MS patients. N = 6

569 bacteria donors per group. \*P<0.05, two-tailed t test. Error bars, mean +/- SEM. Experiment was

570 repeated with non-overlapping PBMC and bacterial donors and gave the same results. **E.**

571 Quantification of T effector cell proliferation in response to Tregs differentiated in presence of

572 spore-forming bacteria from MS patients or controls. N = 3 bacterial donors per group, each

573 representing an average of 3 technical replicates. **F** Linear correlation between IL-10+

574 population within CD3+ CD4+ FoxP3+ Tregs and *Clostridia-Bacilli* relative abundances.  $R^2 =$   
575 0.214,  $p = 0.0459$ . Red dots, MS patients. Blue dots, controls.  $R^2 = 0.214$ ,  $p = 0.046$ .

576

577 **Figure 3. Spore-forming bacteria composition is correlated with T lymphocyte phenotypes**  
578 ***in vivo***. **A.** Clinical EAE scores of mice that after antibiotic treatment had been colonized with  
579 spore-forming bacteria from controls (CTRL\_spore) or MS patients (MS\_spore) for 2 weeks, or  
580 kept on antibiotics (ABX) or in SPF condition as controls, prior to induction of EAE at 9-10  
581 weeks of age.  $N = 5-10$  mice per group. **B, C.** Principal coordinate plot of beta diversity (PCoA;  
582 unweighted Unifrac) (**B**) and genus-level taxonomical distribution (**C**) of mouse fecal microbiota  
583 at 2 weeks of colonization with spore-forming bacteria, 2 separate experiments. **D.** Bacterial  
584 genera whose abundance is correlated with changes in immune cell differentiation in gnotobiotic  
585 mice are shown. The linear correlation between relative abundances of bacterial genera and the  
586 percentage of IL-10+ regulatory and IFN $\gamma$ + Th1 out of CD4+ Th lymphocytes from both spleens  
587 and mesenteric lymph nodes (MLN) of mice colonized with spore-forming bacteria are depicted  
588 as a heatmap. Same samples as in **B-C**. Only the genera that show significant linear correlation  
589 with immune parameters ( $p > 0.05$  after Benjamini-Hochberg adjustment for multiple  
590 comparisons) are included in the heat map. Red rectangle, putative pro-inflammatory subset.  
591 Blue rectangle, putative anti-inflammatory subset. Red font, taxa significantly increased in mice  
592 colonized with spore-forming bacteria from MS patients compared to controls. Blue font, taxa  
593 significantly reduced in mice colonized with spore-forming bacteria from MS patients compared  
594 to controls. **E.** Examples of positive and negative correlation between bacteria and Th  
595 lymphocyte differentiation from **D**.

596

597 **Figure 4. Increased *Akkermansia* is linked with MS-associated changes in spore-forming**  
598 **bacteria and pro-inflammatory T lymphocytes.** **A.** Principal coordinate plot of beta diversity  
599 (PCoA; unweighted Unifrac) of mouse fecal microbiota excluding *Akkermansia* at 2 weeks of  
600 colonization with spore-forming bacteria, 2 separate experiments, colored by *Akkermansia*  
601 presence (red to green: low to high).  $p < 0.001$ , significant contribution of *Akkermansia* presence  
602 to determining distance variation (adonis method for continuous variables). **B.** Relative  
603 abundance of *Akkermansia* in controls and MS patients used for isolation of spore-forming  
604 bacteria.  $p = 1.5E-09$ , negative binomial Wald test, Benjamini-Hochberg correction for multiple

605 comparisons (across all 144 species detected in the dataset). **C.** Linear correlation of relative  
606 abundance of *Akkermansia* with IFN $\gamma$ <sup>+</sup> Th1 lymphocyte differentiation in spleens of mice  
607 colonized with spore-forming bacteria.  $R^2 = 0.18$ ,  $p = 0.0003$ . **D.** Bacterial genera significantly  
608 correlated with *Akkermansia in vivo*.

609

610

611

612 **Supplementary Material**

613

614 **Supplementary Table 1. Spore-forming OTUs that were significantly different between MS**  
615 **patients and controls.** Negative binomial Wald test with Benjamini-Hochberg correction for  
616 multiple comparisons.

617

618 **Supplementary Table 2. Genera that were significantly different between antibiotic-treated**  
619 **mice colonized with spore-forming bacteria from MS patients and controls.** Negative  
620 binomial Wald test with Benjamini-Hochberg correction for multiple comparisons.

621

622 **Supplementary Table 3. OTUs that were significantly different between antibiotic-treated**  
623 **mice colonized with spore-forming bacteria from MS patients and controls.** Negative  
624 binomial Wald test with Benjamini-Hochberg correction for multiple comparisons.

625

626

627 **Supplementary Figure 1. Relative abundance of *Clostridium perfringens* OTUs in spore-**  
628 **forming bacteria of MS patients and controls.** N=30 patients, 24 controls. X axis, OTU IDs  
629 taken from GreenGenes 13.8 database. Y axis, relative abundances after rarefaction to 10,000  
630 reads/sample. Last two columns (highlighted on graph) represent the sum of all individual OTUs.

631

632



**Table 1. Subject characteristics**

| Feature                                  | Cases              | Controls           |
|------------------------------------------|--------------------|--------------------|
| n                                        | 25                 | 24                 |
| Proportion female (%)                    | 80.0%              | 12.5%              |
| Mean age (years [stdev])                 | 44.0 ( $\pm$ 13.0) | 49.3 ( $\pm$ 12.0) |
| Average BMI (stdev)                      | 23.8 ( $\pm$ 4.7)  | 24.2 ( $\pm$ 4.2)  |
| Average disease duration (Years [stdev]) | 13.5 ( $\pm$ 11.9) | N/A                |
| Proportion Off-therapy                   | 28%                | N/A                |
| Proportion therapy naïve                 | 72%                | N/A                |

Figure 1

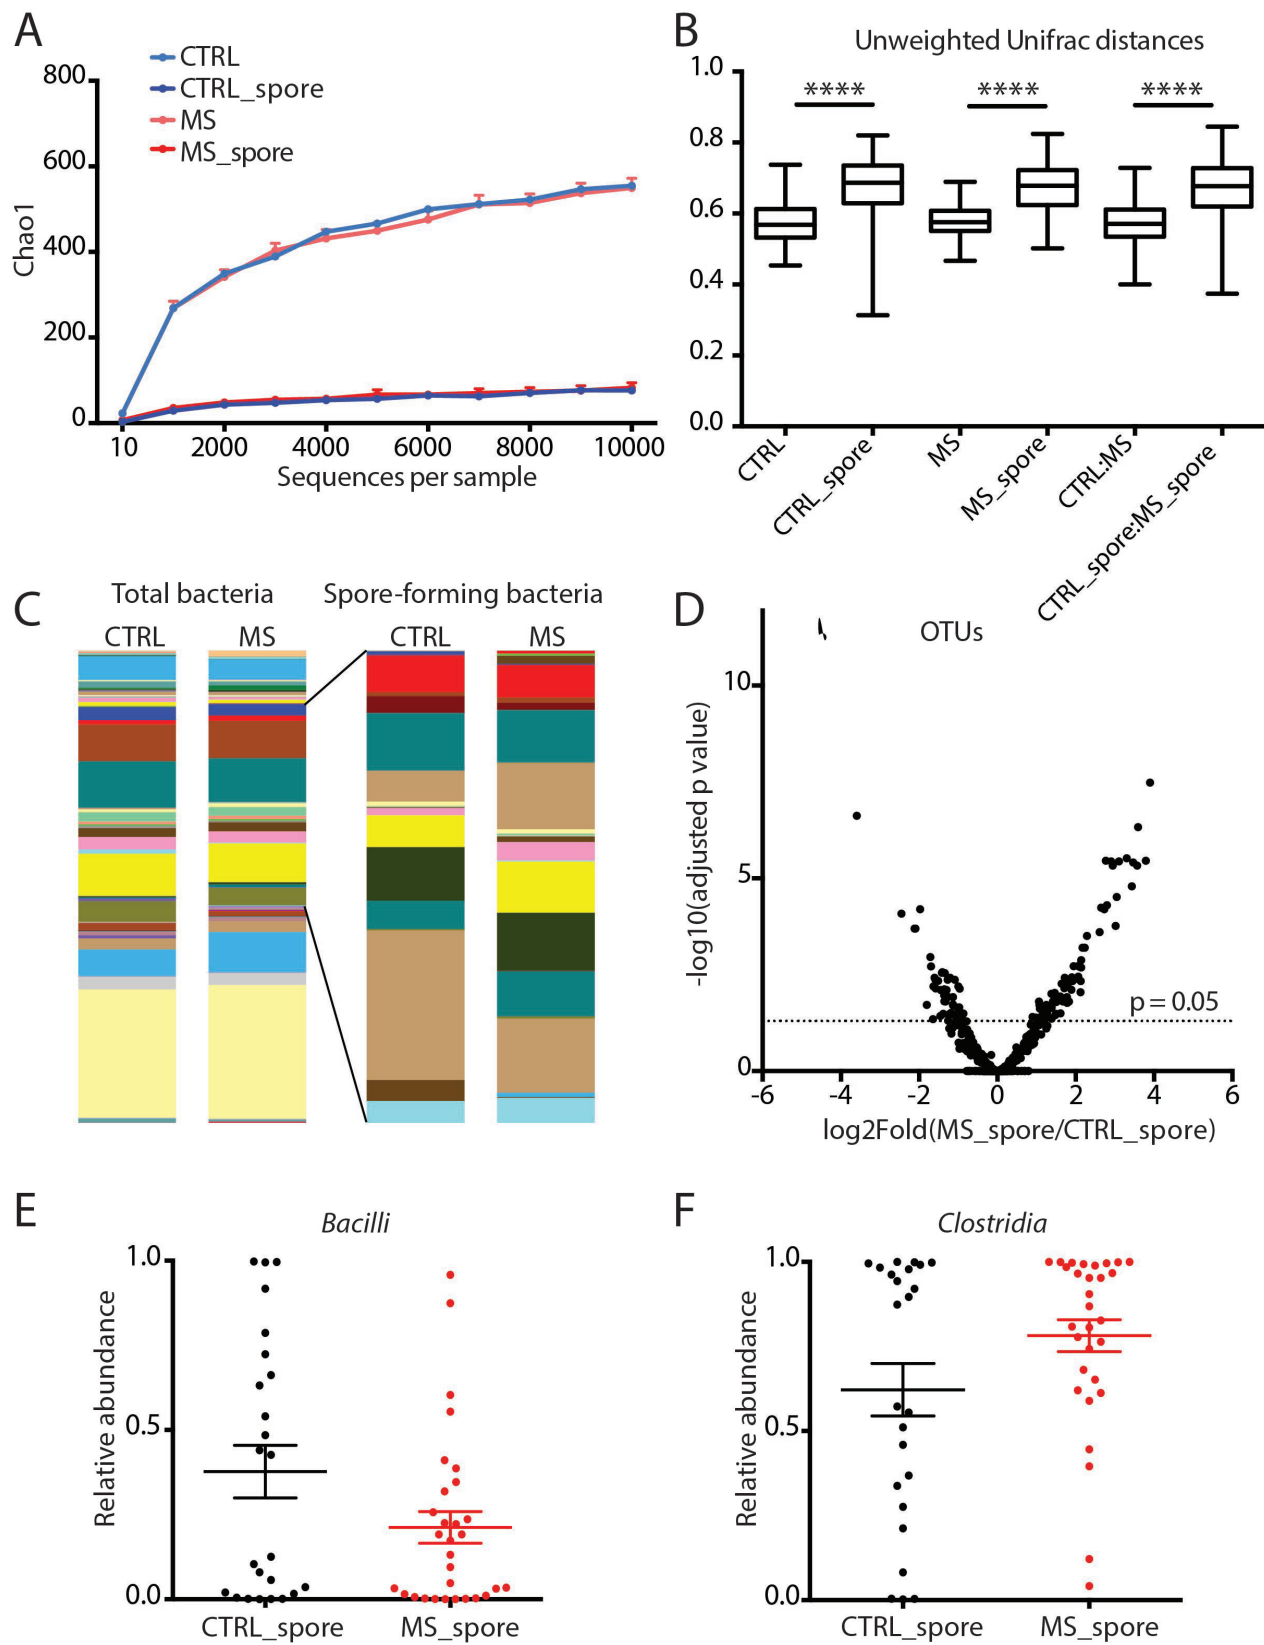

Figure 2

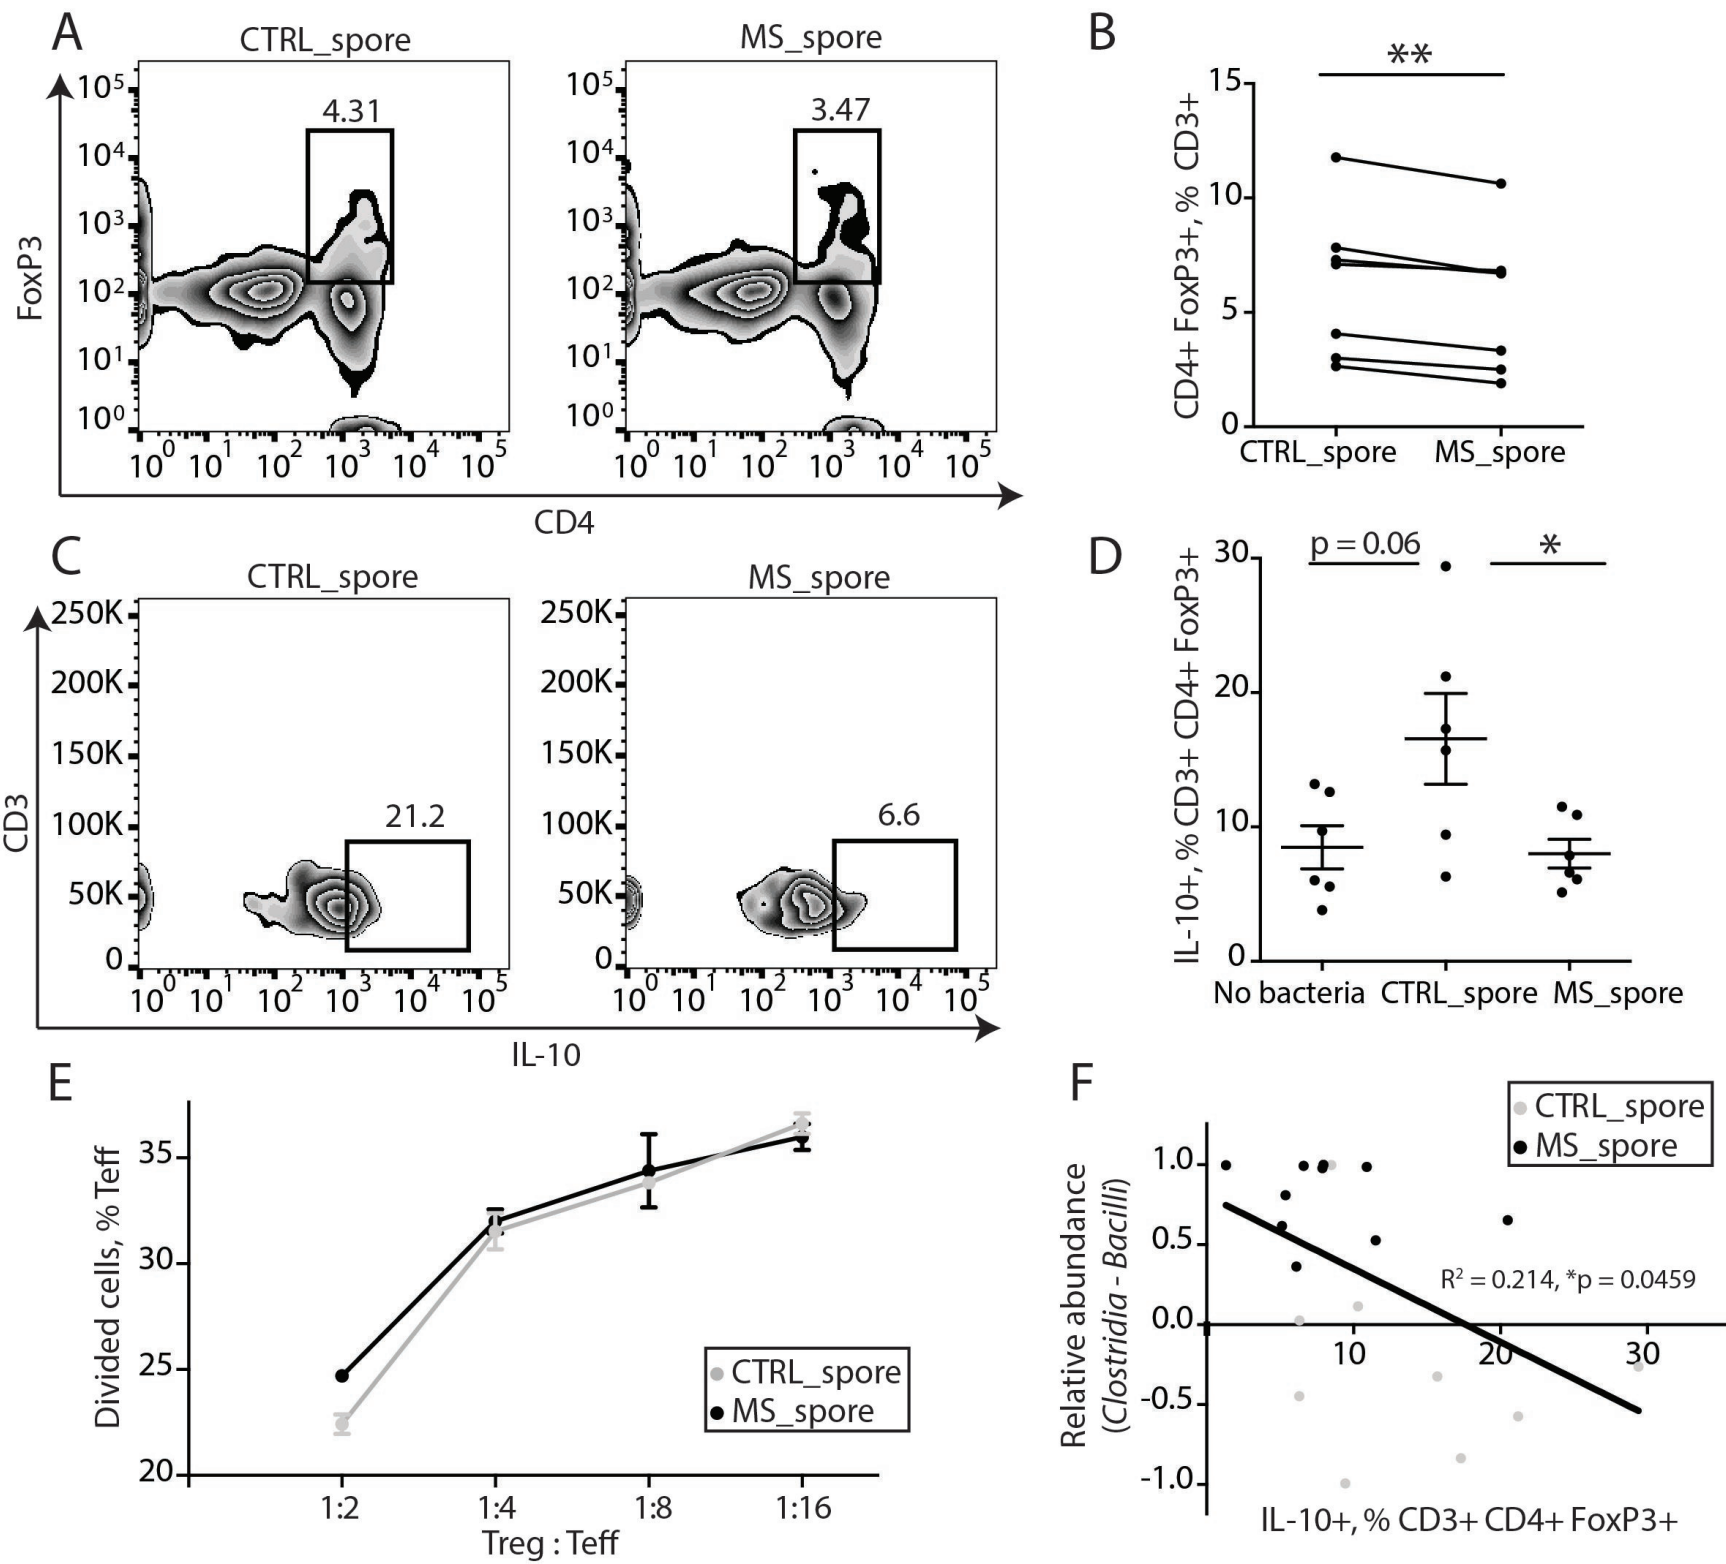

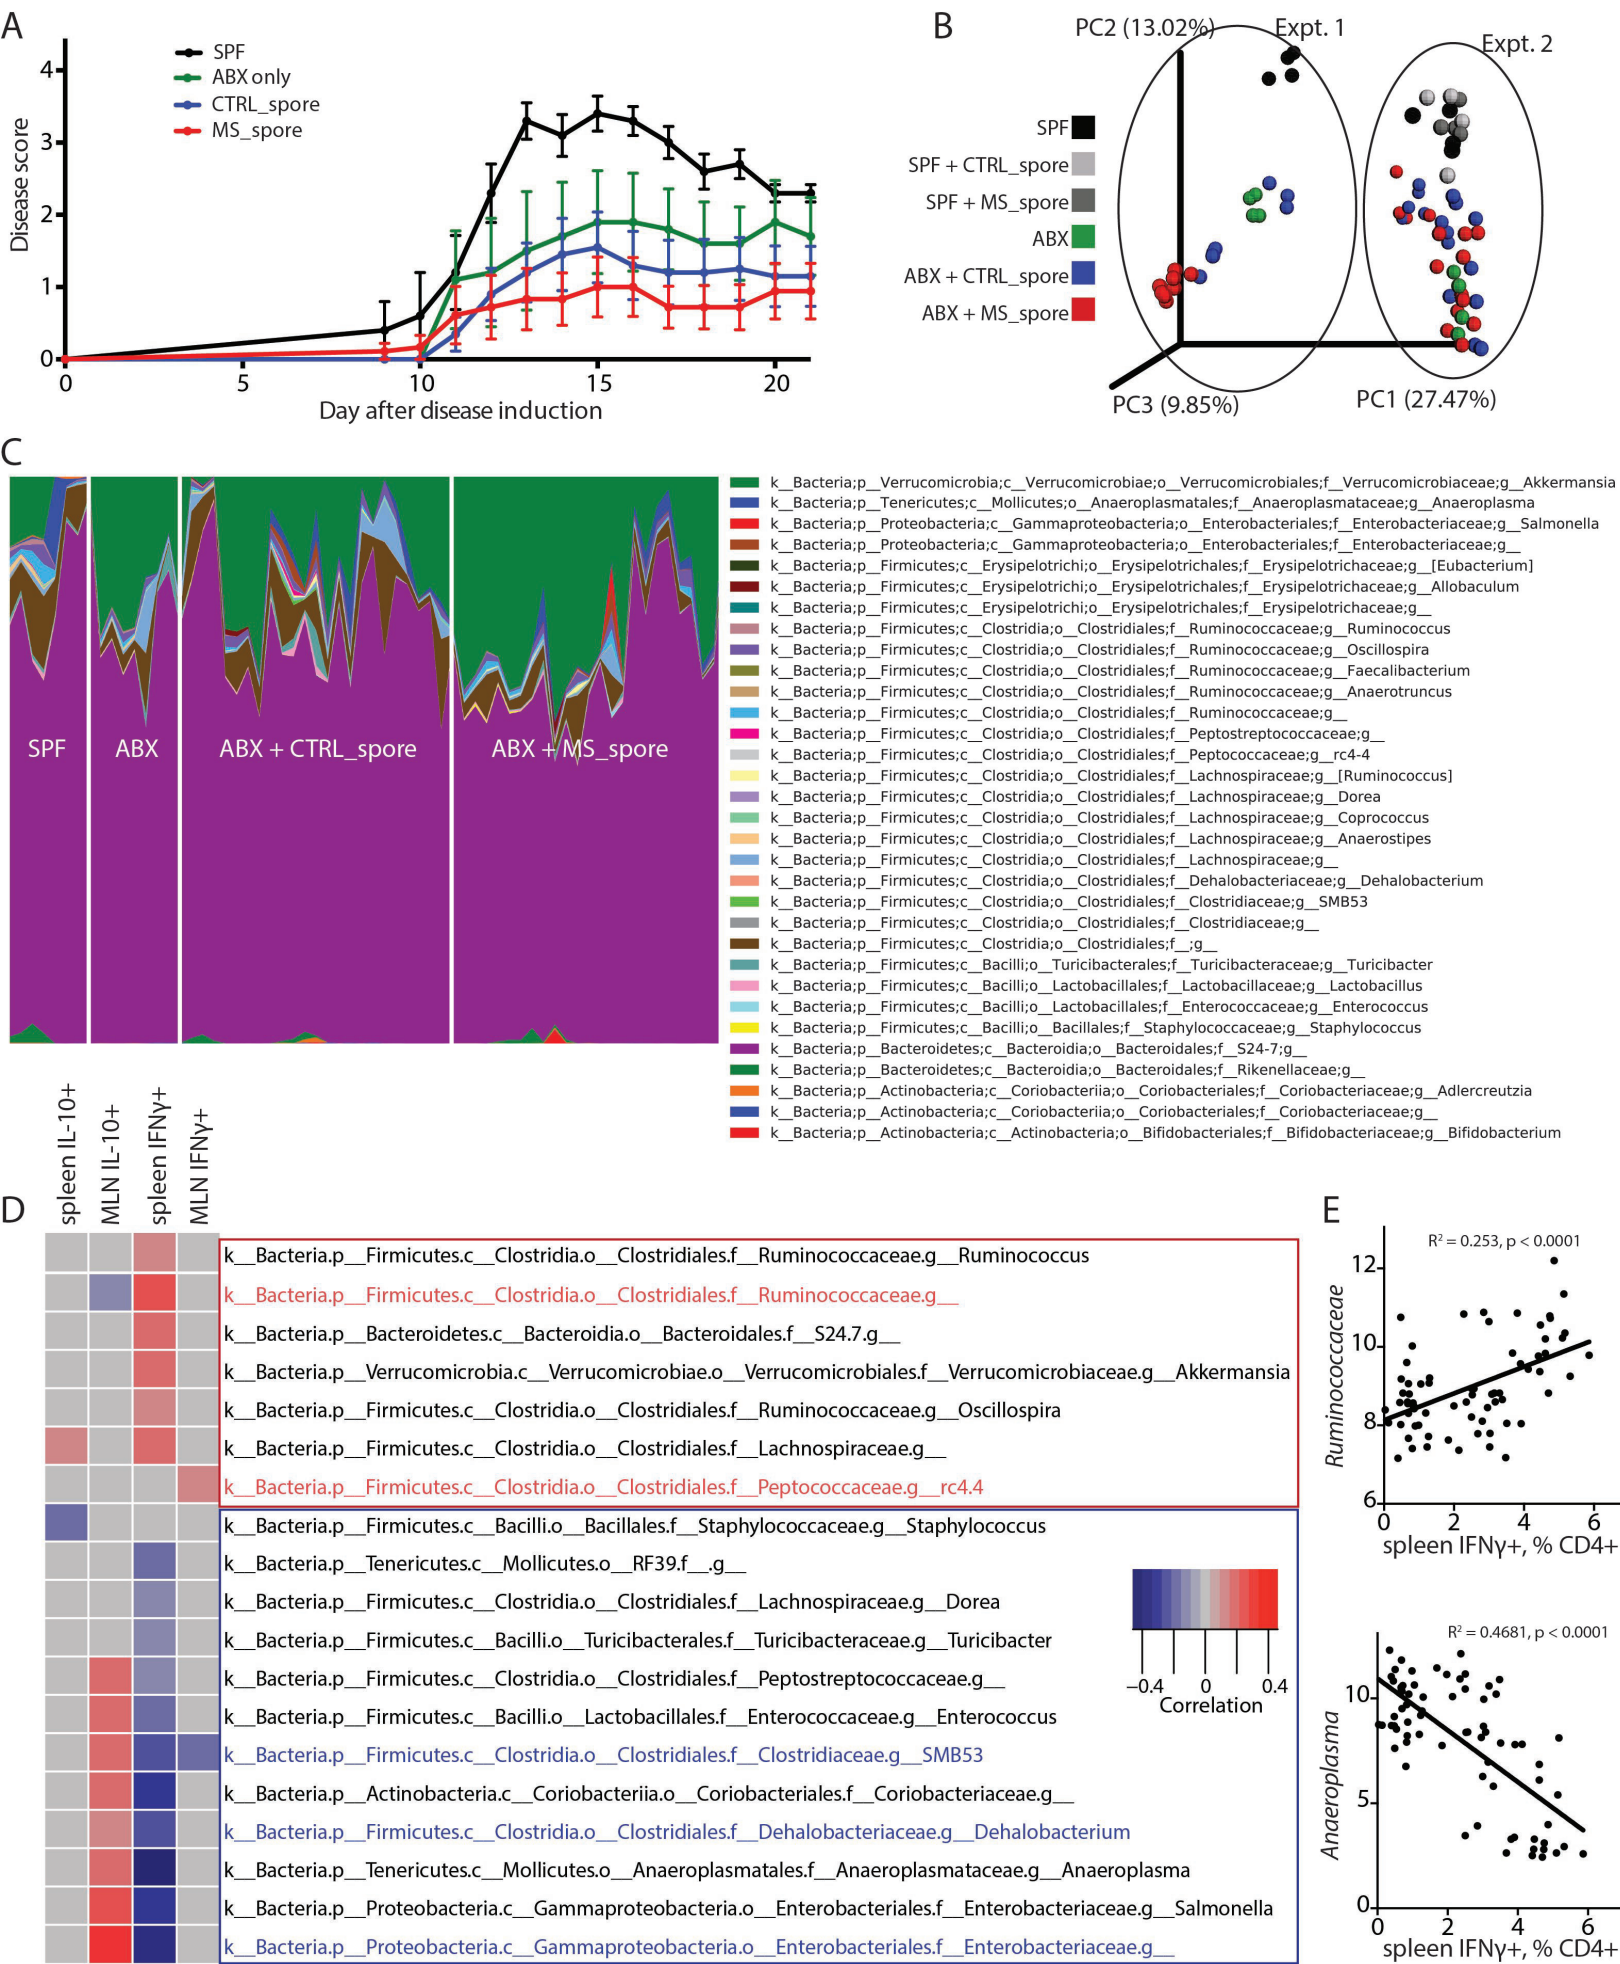

Figure 4

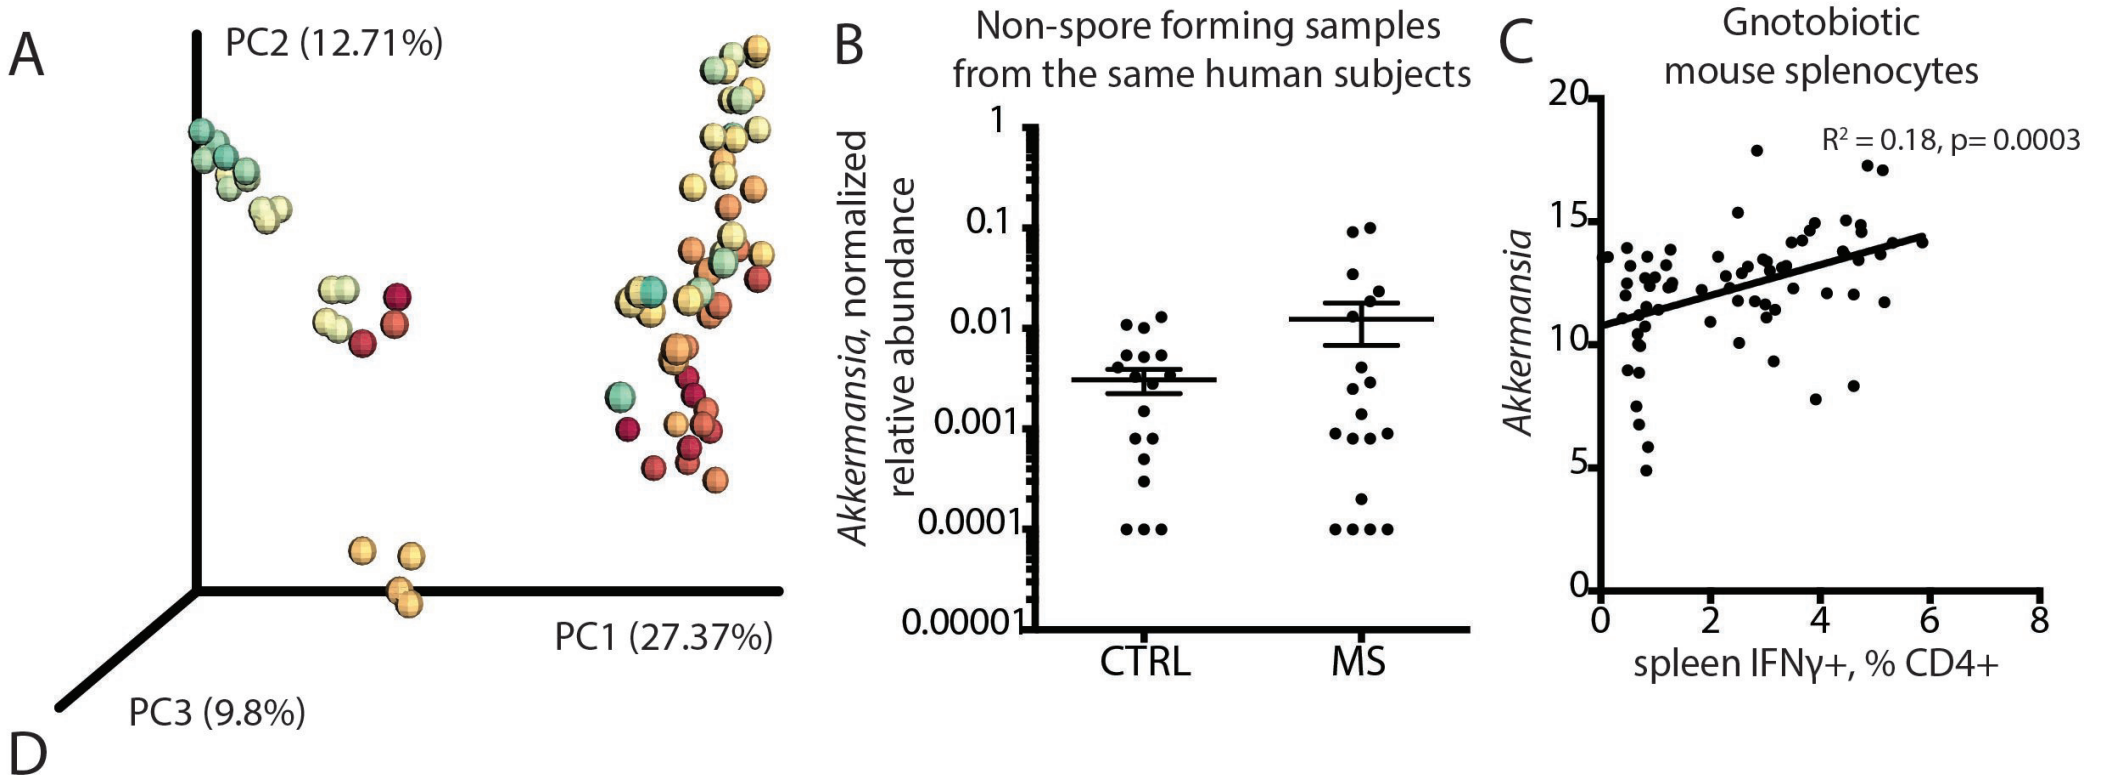

| Genera (red: positive correlation, blue: negative correlation with <i>Akkermansia</i> )                   | R squared | Adjusted P value |
|-----------------------------------------------------------------------------------------------------------|-----------|------------------|
| k__Bacteria.p__Tenericutes.c__Mollicutes.o__RF39.f__g__                                                   | 0.36      | 5.75E-07         |
| k__Bacteria.p__Firmicutes.c__Bacilli.o__Lactobacillales.f__Lactobacillaceae.g__Lactobacillus              | 0.26      | 9.76E-05         |
| k__Bacteria.p__Firmicutes.c__Clostridia.o__Clostridiales.f__Dehalobacteriaceae.g__Dehalobacterium         | 0.25      | 1.98E-04         |
| k__Bacteria.p__Tenericutes.c__Mollicutes.o__Anaeroplasmatales.f__Anaeroplasmataceae.g__Anaeroplasma       | 0.21      | 1.03E-03         |
| k__Bacteria.p__Actinobacteria.c__Coriobacteriia.o__Coriobacteriales.f__Coriobacteriaceae.g__Adlercreutzia | 0.15      | 1.33E-02         |
